# Supplementary material for: Understanding the Impact of Nitrogen Availability: A Limiting Factor for Enhancing Fucoxanthin Productivity in Microalgae Cultivation
Source: MDPI journal article supplement (doi:10.3390/md22020093), 2024-02-18
Supplement: s1 [file s1]

## *Supplementary Materials*

# **Understanding the impact of nitrogen availability: a limiting factor for enhancing fucoxanthin productivity in microalgae cultivation**

**To Quyen Truong<sup>1,2</sup>, Yun Ji Park<sup>2</sup>, Jessica Winarto<sup>1,3</sup>, Phuong Kim Huynh<sup>1,2</sup>, Jinyoung Moon<sup>2</sup>, Yeong Bin Choi<sup>2</sup>, Dae-Geun Song<sup>3</sup>, Song Yi Koo<sup>3</sup>, Sang Min Kim<sup>1,2\*</sup>**

<sup>1</sup> Division of Bio-Medical Science & Technology, Korea Institute of Science and Technology (KIST) School, University of Science and Technology, Seoul 02792, Republic of Korea; ttquyen\_vn@kist.re.kr (T.Q.T.); jessicawinarto@kist.re.kr (J.W.); 623024@kist.re.kr (P.K.H.)

<sup>2</sup> Smart Farm Research Center, KIST Gangneung Institute of Natural Products, Gangneung 25451, Republic of Korea; pyj@kist.re.kr (Y.J.P.); jy77mun@kist.re.kr (J.M.); choiyeongbin@kist.re.kr (Y.B.C.)

<sup>3</sup> Natural Product Informatics Research Center, KIST Gangneung Institute of Natural Products, Gangneung 25451, Republic of Korea; dsong82@kist.re.kr (D.-G.S.); ninesong2@kist.re.kr (S.Y.K.)

\* Correspondence: kimsm@kist.re.kr; Tel.: +82-33-650-3640; Fax: +82-33-650-3679

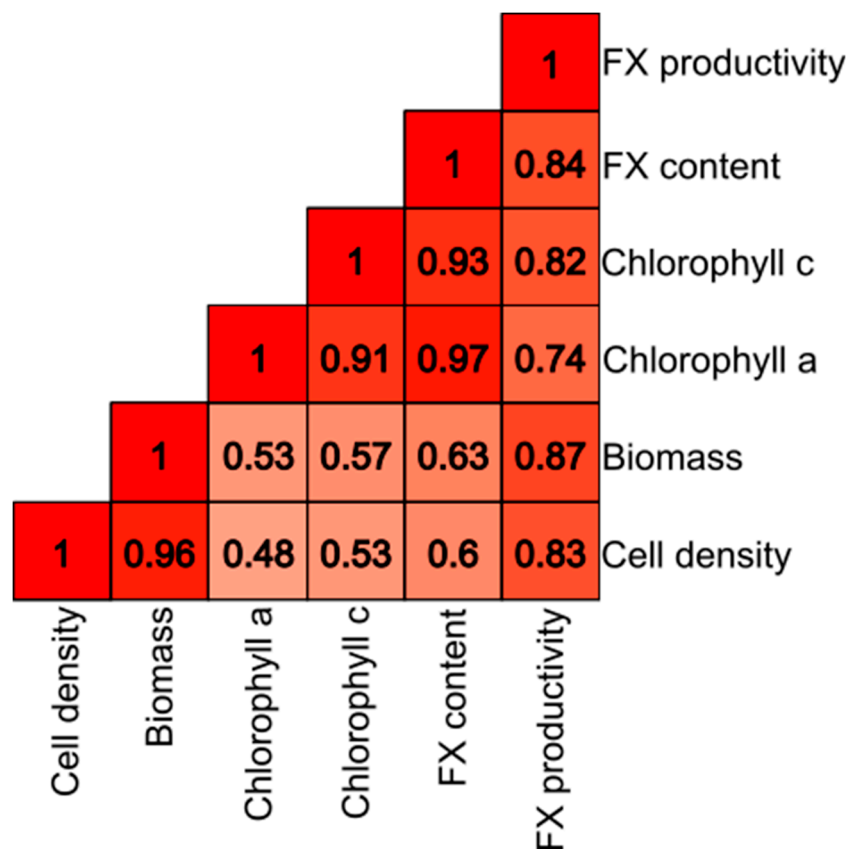

**Supplementary Figure S1.** The correlation analysis of observed traits including cell density, biomass, chlorophyll *a*, *c*, and fucoxanthin production of *Phaeodactylum tricornutum* microalgae cultured at different initial nitrogen concentrations [limited nitrogen (LN), normal nitrogen (NN), and high nitrogen (HN)],  $p < 0.05$ .

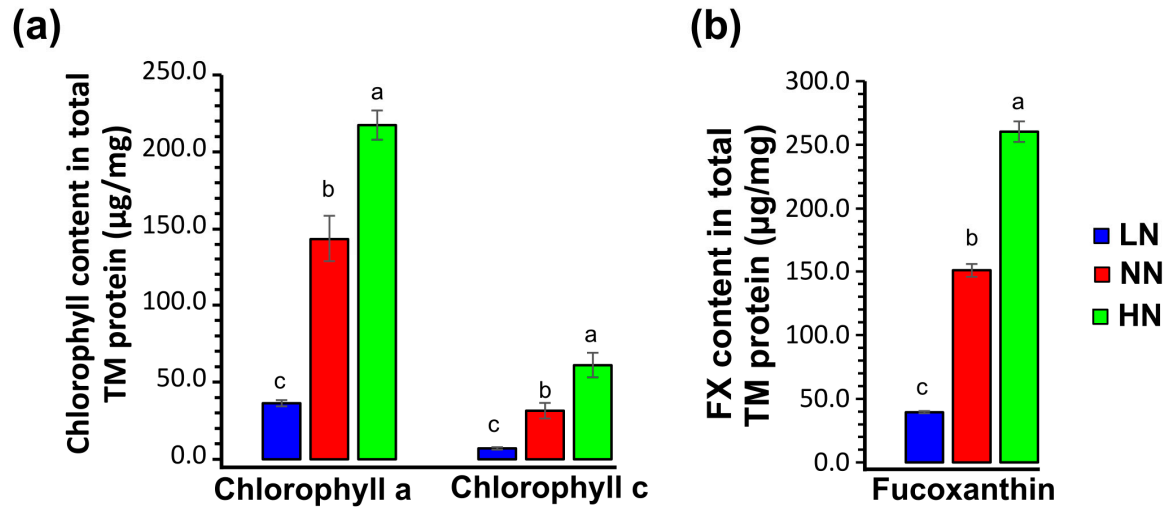

**Supplementary Figure S2.** (a) Chlorophyll *a* and *c* and (b) fucoxanthin content of isolated thylakoid membrane from day-5 samples of *Phaeodactylum tricornutum* microalgae cultured at different nitrogen conditions [limited nitrogen (LN), normal nitrogen (NN), and high nitrogen (HN)]. Different letters denote significant difference amongst three groups analyzed with One-way ANOVA test,  $p < 0.5$ . FX, fucoxanthin; TM, thylakoid membrane.

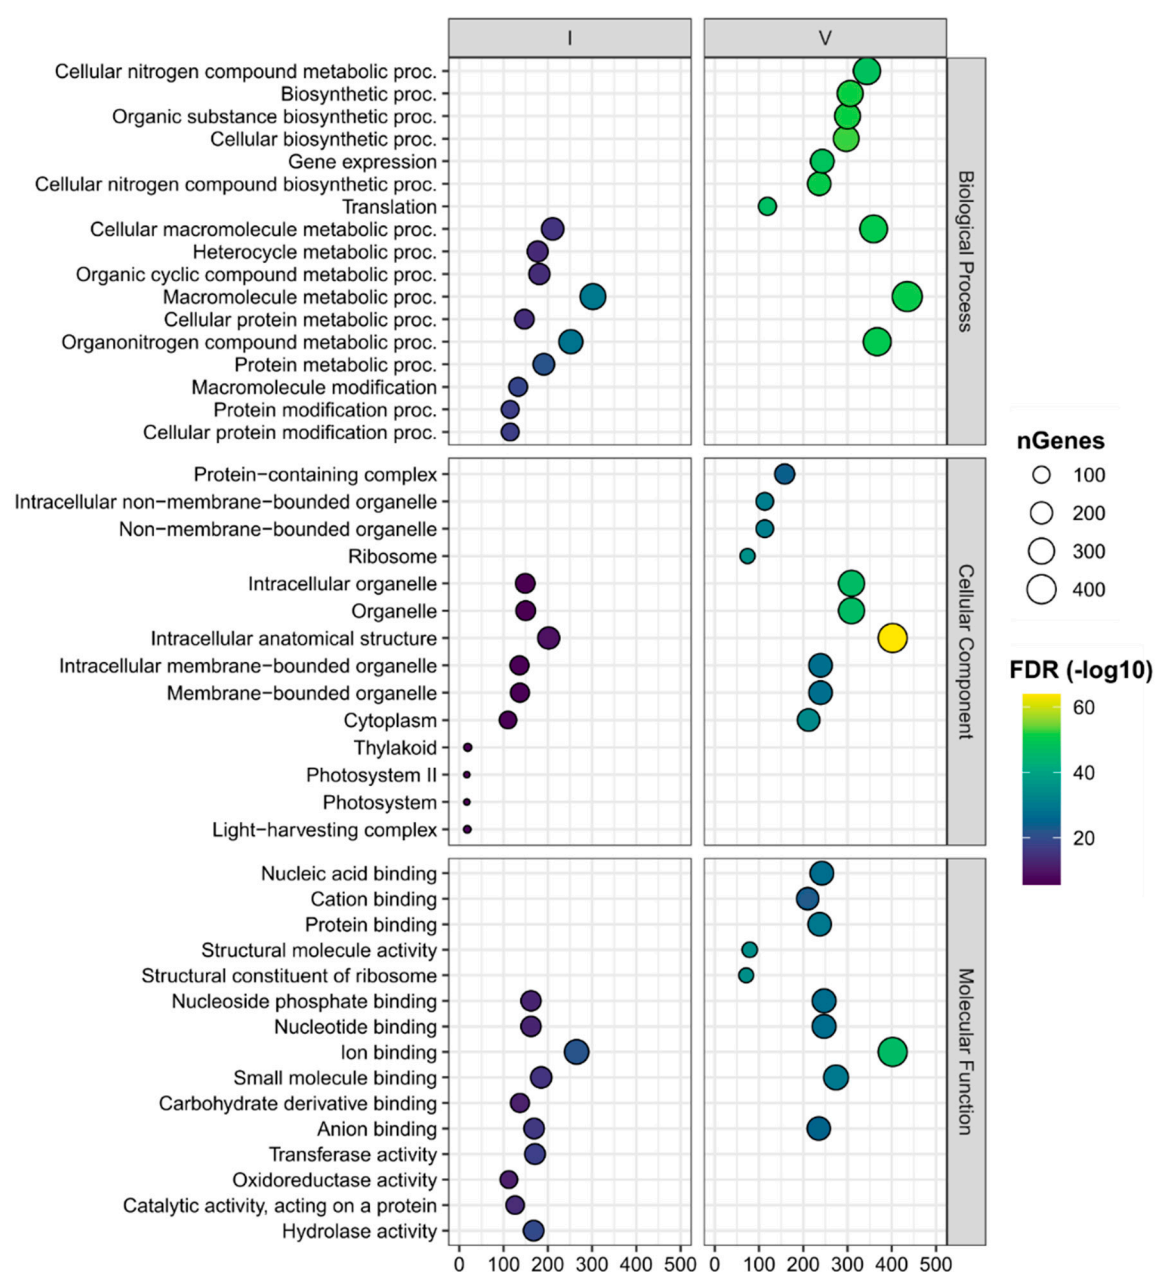

**Supplementary Figure S3.** Top Gene Ontology enrichment of genes found in Cluster I and V. The analysis was performed using online informatics tool-ShinyGO with cutoff 0.05.

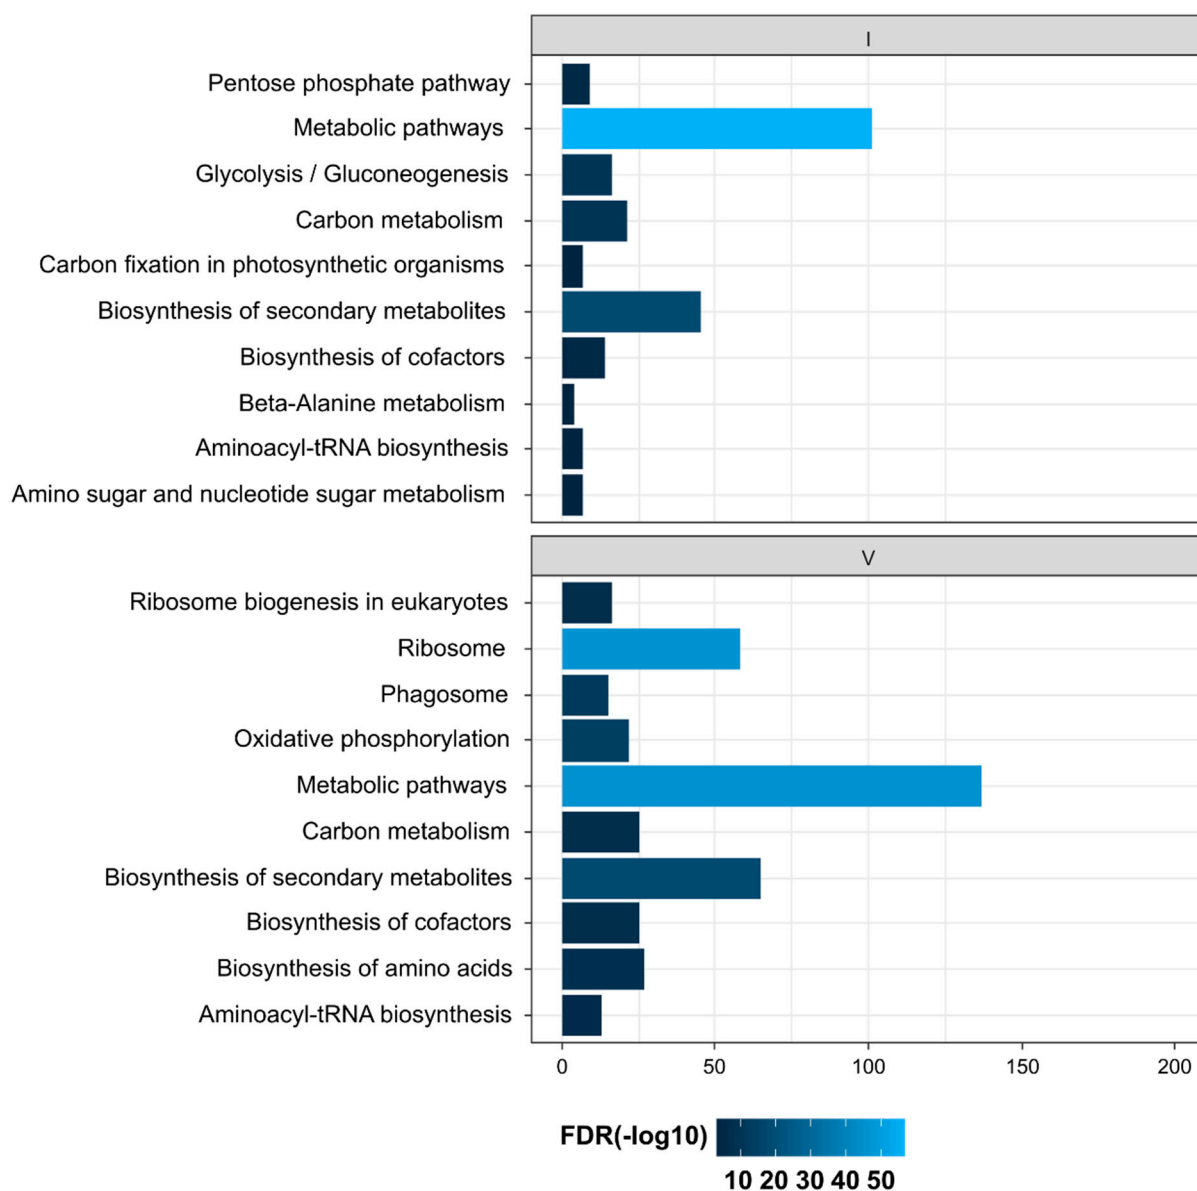

**Supplementary Figure S4.** Top Kyoto Encyclopedia of Genes and Genomes pathways of genes found in Cluster I and V. The analysis was performed using online informatics tool-ShinyGO with a cutoff < 0.05.
