# Supplementary material for: Understanding the Impact of Nitrogen Availability: A Limiting Factor for Enhancing Fucoxanthin Productivity in Microalgae Cultivation
Source: Mar Drugs. 2024 Feb 18;22(2):93. doi: 10.3390/md22020093 (PMC10889934; doi:10.3390/md22020093)
Supplement: Supplementary file 1 [file marinedrugs-22-00093-s001.zip]

Archive with 4 entries (4 files):
- marinedrugs-2860403 supplementary materials.pdf
- TableS1_Information of identified genes involved in nitrogen uptake and assimilation in Phaeodactylum tricornutum.xlsx
- TableS2_Information of identified genes involved in fucoxanthin, chlorophyll ac-binding proteins.xlsx
- TableS3_Information of identified genes involved in MEP and carotenogenesis pathways in Phaeodactylum tricornutum.xlsx
