# Supplementary material for: Understanding the Impact of Nitrogen Availability: A Limiting Factor for Enhancing Fucoxanthin Productivity in Microalgae Cultivation
Source: Mar Drugs. 2024 Feb 18;22(2):93. doi: 10.3390/md22020093 (PMC10889934; doi:10.3390/md22020093)
Supplement: Supplementary file 1 [file marinedrugs-22-00093-s001.zip › TableS1_Information of identified genes involved in nitrogen uptake and assimilation in Phaeodactylum tricornutum.xlsx]

## Sheet: Table S1
No.	Gene ID	Abbreviation	Gene description			Chromosome	Position		Log2FC		adjusted p-value
				Identifier	TAIR annotation		start (bp)	end (bp)	HN vs. NN	LN vs. NN	HN	LN
1	Phatr3_J23059	AAT_1	Aspartate transaminase [Source:UniProtKB/TrEMBL;Acc:B7G9Y7]	Phatr3_J23059.t1	aspartate aminotransferase 1 (ASP1)	21	341906	343370	-0.252715	0.929988	0.0969068	4.30767e-17
2	Phatr3_J23871	AAT_2	Aspartate aminotransferase [Source:UniProtKB/TrEMBL;Acc:B7GDE4]	Phatr3_J23871.t1	aspartate aminotransferase 1 (ASP1)	28	64821	66221	-0.00921047	0.560602	0.90764	1.94741e-12
3	Phatr3_J50577	ACOAT	Acetylornithine aminotransferase [Source:UniProtKB/TrEMBL;Acc:B7GEJ6]	Phatr3_J50577.t1	HOPW1-1-interacting 1 (WIN1)	31	176915	178480	-5.05292	1.35162	8.1e-92	7.79351e-30
4	Phatr3_J3969	AGK	Predicted protein [Source:UniProtKB/TrEMBL;Acc:B7FR48]	Phatr3_J3969.t1	N-acetyl-l-glutamate kinase (NAGK)	1	2444657	2445649	2.68725	0	1.84e-21	1
5	Phatr3_J40880	AGM	Agmatinase [Source:UniProtKB/TrEMBL;Acc:B7GCN5]	Phatr3_J40880.t1	arginase	26	175436	176999	-0.455141	0.49738	0.00366111	1.50359e-07
6	Phatr3_J36913	AGPR	Predicted protein [Source:UniProtKB/TrEMBL;Acc:B5Y408]	Phatr3_J36913.t1	oxidoreductases, acting on the aldehyde or oxo group of donors,NAD orNADP as acceptor copper ion binding	11	645070	646355	-2.46932	-0.259147	1.31e-186	0.218652
7	Phatr3_J38509	AKG	Arginase [Source:UniProtKB/TrEMBL;Acc:B7G627]	Phatr3_J38509.t1	arginase	16	275713	276846	-0.887373	0.688839	3.78e-26	0.222488
8	Phatr3_J34010	ALT2	Predicted protein [Source:UniProtKB/TrEMBL;Acc:B7FUH0]	Phatr3_J34010.t1	alanine aminotransferase 2 (ALAAT2)	4	870058	871611	-0.573359	0.298968	0.000666354	0.90349
9	Phatr3_J27877	AMTa	Predicted protein [Source:UniProtKB/TrEMBL;Acc:B7G0Y4]	Phatr3_J27877.t1	ammonium transporter 1 2 (AMT1 2)	10	106211	108498	-1.50551	0.2306	1.01e-62	0.00111114
10	Phatr3_J11128	AMTd	Predicted protein [Source:UniProtKB/TrEMBL;Acc:B7FW68]	Phatr3_J11128.t1	ammonium transporter 1 1 (AMT1 1)	5	704028	705667	1.72829	0.388886	1.05e-05	0.000234698
11	Phatr3_J1813	AMTe	Predicted protein [Source:UniProtKB/TrEMBL;Acc:B7G0Y1]	Phatr3_J1813.t1	ammonium transporter 1 2 (AMT1 2)	10	95933	97889	-1.86522	0.120361	2.4e-94	0.0855041
12	Phatr3_J1862	AMTg	Predicted protein [Source:UniProtKB/TrEMBL;Acc:B7FSA7]	Phatr3_J1862.t1	ammonium transporter 1 3 (AMT1 3)	2	513920	515539	0.690747	-2.501	5.23e-20	3.37272e-32
13	Phatr3_J13418	AMTh	Predicted protein [Source:UniProtKB/TrEMBL;Acc:B5Y3C5]	Phatr3_J13418.t1	ammonium transporter 1 3 (AMT1 3)	11	100081	101894	-1.57526	-0.199942	1.58e-115	0.34529
14	Phatr3_J34526	ASL	Predicted protein [Source:UniProtKB/TrEMBL;Acc:B7FV31]	Phatr3_J34526.t1	L-Aspartase-like family protein	5	827750	829352	-0.930328	-1.39365	6.2e-23	0.0269883
15	Phatr3_J21116	ASuS	Predicted protein [Source:UniProtKB/TrEMBL;Acc:B5Y3V3]	Phatr3_J21116.t1	arginosuccinate synthase family	11	537602	538858	-1.69998	0.125858	5.6e-39	0.872514
16	Phatr3_J51516	CC1	Predicted protein [Source:UniProtKB/TrEMBL;Acc:B7FSF9]	Phatr3_J51516.t1	NA	2	651489	652906	-0.680751	1.33014	0.0156156	2.10395e-49
17	Phatr3_J24238	CK	Carbamate kinase [Source:UniProtKB/TrEMBL;Acc:B7GEM7]	Phatr3_J24238.t1	NA	32	42637	43892	-0.436211	-0.443569	6.45e-09	0.189205
18	Phatr3_EG01947	CPS-II	Predicted protein [Source:UniProtKB/TrEMBL;Acc:B7G8W8]	Phatr3_EG01947.t1	carbamoyl phosphate synthetase B (CARB)	20	57596	62247	-0.972888	-0.0103645	2.72e-49	0.950234
19	Phatr3_EG02451	CYN	Cyanate hydratase [Source:UniProtKB/Swiss-Prot;Acc:B7FRE8]	Phatr3_EG02451.t1	cyanase (CYN)	1	155963	156544	1.62852	-0.0514748	7.22e-36	0.403577
20	Phatr3_J12902	Fd-NiR	Predicted protein [Source:UniProtKB/TrEMBL;Acc:B7G0L4]	Phatr3_J12902.t1	nitrite reductase 1 (NIR1)	9	732974	734937	-5.79244	0.790985	0	2.67195e-33
21	Phatr3_J54476	FORM1	Formidase [Source:UniProtKB/TrEMBL;Acc:B7FYS6]	Phatr3_J54476.t1	Acetamidase Formamidase family protein	8	374332	376962	-1.56202	1.8272	8.56e-120	2.82777e-26
22	Phatr3_J37719	FORM2	Formamidase-like protein [Source:UniProtKB/TrEMBL;Acc:B7G3J7]	Phatr3_J37719.t1	Acetamidase Formamidase family protein	13	776737	778218	-0.368332	0	0.775692	1
23	Phatr3_J37952	FORM3	Predicted protein [Source:UniProtKB/TrEMBL;Acc:B7G4I3]	Phatr3_J37952.t1	Acetamidase Formamidase family protein	14	499075	501024	-0.543934	0.645734	0.00935417	0.274753
24	Phatr3_J12762	GACT	Predicted protein [Source:UniProtKB/TrEMBL;Acc:B7G0P4]	Phatr3_J12762.t1	arginine biosynthesis protein ArgJ family	9	799843	801479	0.187296	0.0324995	0.614306	0.874352
25	Phatr3_J50971	GDHA	NA	Phatr3_J50971.t1	Amino acid dehydrogenase family protein	10	375403	377035	-0.696876	-0.530155	5.97e-05	3.56573e-05
26	Phatr3_J13951	GDHB	Glutamate dehydrogenase [Source:UniProtKB/TrEMBL;Acc:B7G3X3]	Phatr3_J13951.t1	Amino acid dehydrogenase family protein	13	236291	237707	-2.2365	-0.745199	2.29e-130	0.000247873
27	Phatr3_J45239	GDHC	Predicted protein [Source:UniProtKB/TrEMBL;Acc:B7FWY4]	Phatr3_J45239.t1	glutamate dehydrogenase 2 (GDH2)	6	575369	578831	-0.669679	0.859017	2.12e-11	7.62706e-15
28	Phatr3_J22357	GLNA	GLNA, glutamine synthase [Source:UniProtKB/TrEMBL;Acc:B7G6Q6]	Phatr3_J22357.t1	NA	17	107993	110424	-1.80556	-0.638437	5.85e-55	8.76934e-13
29	Phatr3_J20342	GLTD	Synthase of glutamate synthase [Source:UniProtKB/TrEMBL;Acc:B7FZB0]	Phatr3_J20342.t1	NADH-dependent glutamate synthase 1 (GLT1)	8	786641	788972	-2.1037	0.0938351	1.89e-159	0.556844
30	Phatr3_J51214	GLTX	Ferredoxin-dependent glutamate synthase, fusion of large and small subunits [Source:UniProtKB/TrEMBL;Acc:B7GAZ5]	Phatr3_J51214.t1	NADH-dependent glutamate synthase 1 (GLT1)	22	576784	581702	-1.80557	0.94938	1.41e-122	2.23987e-15
31	Phatr3_J24739	GOGAT-Fd	Predicted protein [Source:UniProtKB/TrEMBL;Acc:B7FPU3]	Phatr3_J24739.t1	glutamate synthase 1 (GLU1)	1	1354327	1359591	-2.31546	0.374166	3.83e-64	6.22039e-10
32	Phatr3_J51092	GSII	Glutamine synthetase [Source:UniProtKB/TrEMBL;Acc:B7G5A1]	Phatr3_J51092.t1	glutamine synthetase 1 4 (GLN1 4)	15	372220	373582	-4.3984	-0.235284	0	0.00104457
33	Phatr3_J12416	HR	Predicted protein [Source:UniProtKB/TrEMBL;Acc:B7FZQ2]	Phatr3_J12416.t1	NA	8	165019	166845	-1.07807	-2.55386	4.31e-52	4.22409e-11
34	Phatr3_J13076	NAR1	Predicted protein [Source:UniProtKB/TrEMBL;Acc:B7G163]	Phatr3_J13076.t1	NA	10	303677	304701	-5.66094	0.347196	0	0.145846
35	Phatr3_J26029	NIT1	Predicted protein [Source:UniProtKB/TrEMBL;Acc:B7FTV6]	Phatr3_J26029.t1	nitrate transporter 2.4 (NRT2.4)	4	356119	357644	-5.87147	0.831531	0	2.43282e-26
36	Phatr3_J45621	NOD	Predicted protein [Source:UniProtKB/TrEMBL;Acc:B7FYB0]	Phatr3_J45621.t1	NA	7	742342	743622	-1.05134	0.777395	1.06e-37	1.32191e-08
37	Phatr3_J54983	NR	Nitrate reductase [Source:UniProtKB/TrEMBL;Acc:B7G997]	Phatr3_J54983.t1	nitrate reductase 1 (NIA1)	20	363436	366254	-5.22968	0.7234	0	0.472536
38	Phatr3_J40691	NRT2b	Predicted protein [Source:UniProtKB/TrEMBL;Acc:B7GC56]	Phatr3_J40691.t1	nitrate transporter 2.2 (NRT2.2)	25	157500	159438	-1.72501	0.329034	3.18e-129	0.918149
39	Phatr3_EG02286	NRT2c	Predicted protein [Source:UniProtKB/TrEMBL;Acc:B7G155]	Phatr3_EG02286.t1	monodehydroascorbate reductase 6 (MDAR6)	10	280353	283784	-5.83972	1.17236	0	2.89143e-05
40	Phatr3_EG02608	NRT2c	NA	Phatr3_EG02608.t1	nitrate transporter2.5 (NRT2.5)	2	680094	681616	-9.01761	-0.0744674	0	0.600436
41	Phatr3_J2032	NRT2d	Predicted protein [Source:UniProtKB/TrEMBL;Acc:B7GCW3]	Phatr3_J2032.t1	nitrate transporter2.5 (NRT2.5)	26	379428	381316	0.380964	-0.0346968	5.79e-08	0.748569
42	Phatr3_J54560	NRT2e	Predicted protein [Source:UniProtKB/TrEMBL;Acc:B7G0V8]	Phatr3_J54560.t1	NA	10	32419	33999	-4.82102	0.746938	1.27e-298	0.000308796
43	Phatr3_J2171	NRT2f	Predicted protein [Source:UniProtKB/TrEMBL;Acc:B7GE09]	Phatr3_J2171.t1	high affinity nitrate transporter 2.6 (NRT2.6)	29	271321	273114	-0.659663	0.873084	2.65e-14	2.2802e-18
44	Phatr3_J27726	OAT	Ornithine aminotransferase [Source:UniProtKB/TrEMBL;Acc:B7G0H9]	Phatr3_J27726.t1	ornithine-delta-aminotransferase (DELTA-OAT)	9	655478	657275	0.0285043	2.57742	0.769714	4.22002e-140
45	Phatr3_J35643	OCD1	Predicted protein [Source:UniProtKB/TrEMBL;Acc:B7FYV2]	Phatr3_J35643.t1	NA	8	428442	429455	0.329032	-0.626372	4.53e-05	1.45204e-15
46	Phatr3_J34775	OCD2	Predicted protein [Source:UniProtKB/TrEMBL;Acc:B7FWM9]	Phatr3_J34775.t1	NAD(P)-binding Rossmann-fold superfamily protein	6	342673	343737	0.564486	-0.144858	0.0653888	0.296789
47	Phatr3_J54222	OCD3	Ornithine cyclodeaminase [Source:UniProtKB/TrEMBL;Acc:B7FTP5]	Phatr3_J54222.t1	NAD(P)-binding Rossmann-fold superfamily protein	4	221347	222438	1.50046	0.0829165	2.38e-11	0.288027
48	Phatr3_J2834	ODC1	Predicted protein [Source:UniProtKB/TrEMBL;Acc:B7FUC2]	Phatr3_J2834.t1	NA	4	752782	754227	0.131097	-0.30954	0.143813	0.120458
49	Phatr3_J12642	ODC2	NA	Phatr3_J12642.t1	Pyridoxal-dependent decarboxylase family protein	9	945758	948021	1.4228	-0.290832	1.18e-64	0.000310265
50	Phatr3_J30514	OTC	Predicted protein [Source:UniProtKB/TrEMBL;Acc:B7GBF1]	Phatr3_J30514.t1	ornithine carbamoyltransferase (OTC)	23	383678	384883	-2.71953	0.0426398	7.48e-58	0.644964
51	Phatr3_EG00333	PLAAOX	NA	Phatr3_EG00333.t1	NA	21	147001	150114	-0.0487925	-1.09989	0.7926	0.0921218
52	Phatr3_J13232	PRODH1	Predicted protein [Source:UniProtKB/TrEMBL;Acc:B5Y3X0]	Phatr3_J13232.t1	Methylenetetrahydrofolate reductase family protein	11	577371	579394	-3.44287	-0.399912	4.82e-221	2.40248e-06
53	Phatr3_J1155	PRODH2	Predicted protein [Source:UniProtKB/TrEMBL;Acc:B5Y3W5]	Phatr3_J1155.t1	Methylenetetrahydrofolate reductase family protein	11	562170	563885	-0.423348	0.279012	8.67e-05	0.0131965
54	Phatr3_J31906	PSCDH	Aldehyde dehydrogenase [Source:UniProtKB/TrEMBL;Acc:B7FPN7]	Phatr3_J31906.t1	aldehyde dehydrogenase 12A1 (ALDH12A1)	1	1222095	1223885	0.370133	1.19359	0.0480688	1.15039e-19
55	Phatr3_J16375	PSCR1	Pyrroline-5-carboxylate reductase [Source:UniProtKB/TrEMBL;Acc:B7GCG6]	Phatr3_J16375.t1	pyrroline-5- carboxylate (P5C) reductase (P5CR)	25	458643	460061	-0.307705	0.128778	2.83e-05	0.229127
56	Phatr3_J25379	PSCR2	Pyrroline-5-carboxylate reductase [Source:UniProtKB/TrEMBL;Acc:B7FSS9]	Phatr3_J25379.t1	pyrroline-5- carboxylate (P5C) reductase (P5CR)	2	923829	925069	0.953115	0.329152	3.1e-09	0.00327105
57	Phatr3_J18027	PSCS1	Predicted protein {ECO:0000313|EMBL:EEC47444.1} [Source:UniProtKB/TrEMBL,Acc:B7G155]	Phatr3_J18027.t1	delta 1-pyrroline-5-carboxylate synthase 2 (P5CS2)	2	76969	79377	-0.620285	-0.130859	8.81e-18	0.132344
58	Phatr3_J40200	PtNOA	Predicted protein [Source:UniProtKB/TrEMBL;Acc:B7GAR9]	Phatr3_J40200.t1	BRASSINAZOLE(BRZ) INSENSITIVE PALE GREEN 2 (BPG2)	22	391777	394285	0.637666	0.0858094	2.79e-15	0.75028
59	Phatr3_J37957	THB1	Predicted protein [Source:UniProtKB/TrEMBL;Acc:B7G4I8]	Phatr3_J37957.t1	NA	14	510720	511304	-0.230289	-0.0447705	0.359019	0.797121
60	Phatr3_J24195	unCPS	CPS III, carbamoyl-phosphate synthase mitochindrial [Source:UniProtKB/TrEMBL;Acc:B7GEG8]	Phatr3_J24195.t1	carbamoyl phosphate synthetase B (CARB)	31	97309	102038	-4.37173	-0.213921	1.59e-285	0.0649962
61	Phatr3_J29702	UREC	Predicted protein [Source:UniProtKB/TrEMBL;Acc:B7G7W5]	Phatr3_J29702.t1	urease (URE)	18	383713	386719	0.149482	-0.0904966	0.140052	0.303561
62	Phatr3_J48625	URED-F	Predicted protein [Source:UniProtKB/TrEMBL;Acc:B7G7X5]	Phatr3_J48625.t1	urease accessory protein D (URED)	18	421182	423293	0.116805	-2.59912	0.263308	6.74456e-36
63	Phatr3_J5145	UREG	Predicted protein [Source:UniProtKB/TrEMBL;Acc:B7G7W4]	Phatr3_J5145.t1	urease accessory protein G (UREG)	18	382251	383228	0.416524	0.249155	0.000166907	0.227746
64	Phatr3_J20424	UT1	Urea transporter [Source:UniProtKB/TrEMBL;Acc:B7FZW5]	Phatr3_J20424.t1	DEGRADATION OF UREA 3 (DUR3)	9	103390	106328	-3.60451	0.0977572	1.29e-125	0.218952
65	Phatr3_J768	UT2	NA	Phatr3_J768.t1	DEGRADATION OF UREA 3 (DUR3)	9	111100	113654	-0.601805	0.540107	0.000182051	2.72082e-05
66	Phatr3_J39772	UT3	Predicted protein [Source:UniProtKB/TrEMBL;Acc:B7G9K5]	Phatr3_J39772.t1	NA	20	670083	671381	-0.48488	0.578286	0.00238442	0.100234
67	Phatr3_J28245	VNRT1	Chloride channel protein [Source:UniProtKB/TrEMBL;Acc:B5Y3W1]	Phatr3_J28245.t1	chloride channel D (CLC-D)	11	549096	551840	-1.29326	0.0768319	2.41e-33	0.4216
68	Phatr3_EG01952	VNRT2	Predicted protein [Source:UniProtKB/TrEMBL;Acc:B7G9G8]	Phatr3_EG01952.t1	NA	20	564516	566315	-8.69384	-0.133751	0	0.273351
69	Phatr3_J46097	VNRT3	Chloride channel protein [Source:UniProtKB/TrEMBL;Acc:B7G021]	Phatr3_J46097.t1	chloride channel A (CLC-A)	9	262458	265400	1.51834	-1.24354	1.47e-41	6.27978e-05
