# Supplementary material for: Understanding the Impact of Nitrogen Availability: A Limiting Factor for Enhancing Fucoxanthin Productivity in Microalgae Cultivation
Source: Mar Drugs. 2024 Feb 18;22(2):93. doi: 10.3390/md22020093 (PMC10889934; doi:10.3390/md22020093)
Supplement: Supplementary file 1 [file marinedrugs-22-00093-s001.zip › TableS2_Information of identified genes involved in fucoxanthin, chlorophyll ac-binding proteins.xlsx]

## Sheet: Table S2
No.	Gene ID	Abbreviation	Gene description	Chromosome	Position		Log2FC		Adjusted p-value
					start (bp)	end (bp)	HN vs. NN	LN vs. NN	HN	LN
1	Phatr3_J6062	FCPA/B	Predicted protein [Source:UniProtKB/TrEMBL;Acc:B7G6S9]	17	157611	158843	5.16621	-0.774618	5.05e-88	1.09425e-05
2	Phatr3_J18049	LHCF1	Fucoxanthin-chlorophyll a-c binding protein A, chloroplastic [Source:UniProtKB/Swiss-Prot;Acc:Q08584]	2	137096	137686	5.16831	0.0112917	2.2e-152	0.966673
3	Phatr3_J25172	LHCF2	Fucoxanthin-chlorophyll a-c binding protein B, chloroplastic [Source:UniProtKB/Swiss-Prot;Acc:Q08585]	2	135961	136557	4.41785	-0.0514189	0	0.70003
4	Phatr3_J25168	LHCF3	Fucoxanthin-chlorophyll a-c binding protein C, chloroplastic [Source:UniProtKB/Swiss-Prot;Acc:Q08586]	2	132619	133215	1.57331	0.454227	4.31e-57	6.54533e-05
5	Phatr3_J50705	LHCF4	Fucoxanthin-chlorophyll a-c binding protein C, chloroplastic [Source:UniProtKB/Swiss-Prot;Acc:Q08586]	2	134351	134947	1.70485	-0.00325004	1.49e-62	0.987791
6	Phatr3_J30648	LHCF5	Fucoxanthin-chlorophyll a-c binding protein E, chloroplastic [Source:UniProtKB/Swiss-Prot;Acc:Q41093]	24	469654	470247	4.51476	1.06921	0	2.71655e-32
7	Phatr3_J29266	LHCF6	Protein fucoxanthin chlorophyll a/c protein [Source:UniProtKB/TrEMBL;Acc:B7G5S7]	15	811969	812583	4.91768	0.600695	0	3.57405e-10
8	Phatr3_J30643	LHCF7	Protein fucoxanthin chlorophyll a/c protein [Source:UniProtKB/TrEMBL;Acc:B7G5S7]	24	407197	407811	4.80411	-1.73753	1.7e-213	5.1811e-09
9	Phatr3_J22395	LHCF8	Protein fucoxanthin chlorophyll a/c protein [Source:UniProtKB/TrEMBL;Acc:B7G6Y1]	17	288763	289365	7.07908	-0.321467	6.32e-80	4.88923e-05
10	Phatr3_J22006	LHCF10	Protein fucoxanthin chlorophyll a/c protein [Source:UniProtKB/TrEMBL;Acc:B7G5B6]	15	402936	403767	0.757697	-0.404307	2.26e-09	0.0768388
11	Phatr3_J51230	LHCF11	Fucoxanthin-chlorophyll a-c binding protein F, chloroplastic [Source:UniProtKB/Swiss-Prot;Acc:Q41094]	24	468365	468958	-0.383518	0.526197	0.0176282	1.37012e-07
12	Phatr3_J16302	LHCF12	Protein fucoxanthin chlorophyll protein [Source:UniProtKB/TrEMBL;Acc:B7GCA2]	25	273174	273955	4.24086	-0.250925	2.39e-53	0.0287952
13	Phatr3_J25893	LHCF14	Fucoxanthin chlorophyll a/c protein, lhcf type [Source:UniProtKB/TrEMBL;Acc:B5Y5L4]	3	1216870	1217457	4.40802	0.628924	5.34e-164	1.95461e-09
14	Phatr3_J48882	LHCF15	Protein fucoxanthin chlorophyll a/c protein [Source:UniProtKB/TrEMBL;Acc:B7G8Q1]	19	569585	570772	4.24522	-1.55389	1.31e-46	0.390589
15	Phatr3_J34536	LHCF16	Protein fucoxanthin chlorophyll a/c protein [Source:UniProtKB/TrEMBL;Acc:B7FV42]	5	849258	850321	2.8256	-0.733432	5.57e-10	0.0480703
16	Phatr3_EG02221	LHCF17	Predicted protein [Source:UniProtKB/TrEMBL;Acc:B7GC98]	25	263713	267262	0.652514	-1.75042	2.49e-14	3.04246e-69
17	Phatr3_J11006	LHCR1	Protein fucoxanthin chlorophyll a/c protein [Source:UniProtKB/TrEMBL;Acc:B7FUM6]	4	1013676	1014488	3.80257	0.261467	4.43e-230	0.000479526
18	Phatr3_J22956	LHCR2	Protein fucoxanthin chlorophyll a/c protein [Source:UniProtKB/TrEMBL;Acc:B7G9B9]	20	434104	435074	1.57734	0.810417	2.19e-06	1.21464e-46
19	Phatr3_J9799	LHCR3	Protein fucoxanthin chlorophyll a/c protein [Source:UniProtKB/TrEMBL;Acc:B7FSP4]	2	847820	848714	2.88367	-0.393839	6.58e-157	9.23462e-09
20	Phatr3_J17766	LHCR4	Protein fucoxanthin chlorophyll a/c protein [Source:UniProtKB/TrEMBL;Acc:B7FQE1]	1	1848990	1849816	4.82001	-0.871087	0	5.39192e-22
21	Phatr3_J14986	LHCR5	Protein fucoxanthin chlorophyll a/c protein [Source:UniProtKB/TrEMBL;Acc:B7G6N5]	17	55656	56438	0.363137	-0.187678	0.0049971	0.180995
22	Phatr3_J14242	LHCR6	Protein fucoxanthin chlorophyll a/c protein [Source:UniProtKB/TrEMBL;Acc:B7G4U8]	14	790347	791241	1.27078	0.0674341	1.47e-46	0.617099
23	Phatr3_J18180	LHCR7	Protein fucoxanthin chlorophyll a/c protein [Source:UniProtKB/TrEMBL;Acc:B7FSI1]	2	708701	709863	-0.723756	-0.044405	7.93e-15	0.600933
24	Phatr3_J32294	LHCR8	Protein fucoxanthin chlorophyll a/c protein [Source:UniProtKB/TrEMBL;Acc:B7FQS0]	1	2139280	2139993	1.38917	1.31607	7.5e-05	2.73023e-48
25	Phatr3_J10243	LHCR9	Fucoxanthin chlorophyll a/c protein, lhcr type [Source:UniProtKB/TrEMBL;Acc:B5Y4K0]	3	243184	244106	-0.336823	0.711814	0.00778167	1.08514e-18
26	Phatr3_J16481	LHCR10	Protein fucoxanthin chlorophyll a/c protein [Source:UniProtKB/TrEMBL;Acc:B7GCV9]	26	369567	370265	-1.56799	-0.385714	8.03e-40	0.000381463
27	Phatr3_J23257	LHCR11	Protein fucoxanthin chl a/c protein [Source:UniProtKB/TrEMBL;Acc:B7GAS4]	22	401634	402374	5.26843	1.00012	0	3.72054e-14
28	Phatr3_J54027	LHCR12	Protein fucoxanthin chlorophyll a/c protein [Source:UniProtKB/TrEMBL;Acc:B7FQE0]	1	1847731	1848740	3.12065	-0.153594	2.29e-173	0.153963
29	Phatr3_J14442	LHCR13	Protein fucoxanthin chlorophyll a/c protein [Source:UniProtKB/TrEMBL;Acc:B7G502]	15	128550	129363	4.68906	0.938538	8.95e-256	2.35397e-07
30	Phatr3_J14386	LHCR14	Protein fucoxanthin chlorophyll a/c protein [Source:UniProtKB/TrEMBL;Acc:B7G503]	15	130319	131033	3.1201	-0.766584	9.78e-22	7.6552e-07
31	Phatr3_J27278	LHCX1	Protein fucoxanthin chlorophyll a/c protein [Source:UniProtKB/TrEMBL;Acc:B7FYL0]	7	996221	997124	-0.829563	0.299367	0.0145994	0.000293426
32	Phatr3_J44733	LHCX3	Protein fucoxanthin chlorophyll a/c protein [Source:UniProtKB/TrEMBL;Acc:B7FVF9]	5	76676	77606	-0.028243	-0.0654927	0.889662	0.664858
33	Phatr3_J38720	LHCX4	Protein fucoxanthin chlorophyll a/c protein [Source:UniProtKB/TrEMBL;Acc:B7G6N3]	17	53010	53733	0.580996	-0.400816	1.51e-06	0.101161
