# Supplementary material for: Understanding the Impact of Nitrogen Availability: A Limiting Factor for Enhancing Fucoxanthin Productivity in Microalgae Cultivation
Source: Mar Drugs. 2024 Feb 18;22(2):93. doi: 10.3390/md22020093 (PMC10889934; doi:10.3390/md22020093)
Supplement: Supplementary file 1 [file marinedrugs-22-00093-s001.zip › TableS3_Information of identified genes involved in MEP and carotenogenesis pathways in Phaeodactylum tricornutum.xlsx]

## Sheet: Table S3
No.	Gene ID	Abbreviation	Gene description	Identifier	TAIR annotation	Chromosome	Position		Log2FC		adjusted p-value
							start (bp)	end (bp)	HN vs. NN	LN vs. NN	HN	LN
1	Phatr3_EG02383	CMK	Predicted protein [Source:UniProtKB/TrEMBL;Acc:B7FUQ8]	Phatr3_EG02383.t1	ATPase, AAA-type, CDC48 protein	4	1092807	1100067	-0.334451	-0.367678	6.87e-05	0.00454456
2	Phatr3_J51868	CRTISO1	Carotenoid isomerase [Source:UniProtKB/TrEMBL;Acc:B7FXV4]	Phatr3_J51868.t1	FADNAD(P)-binding oxidoreductase family protein	7	329508	331451	-0.507175	0.253839	2.72e-05	0.0277323
3	Phatr3_J54826	CRTISO2	NA	Phatr3_J54826.t1	FADNAD(P)-binding oxidoreductase family protein	15	645700	647854	1.57939	-0.439944	1.9e-17	0.00145776
4	Phatr3_J54842	CRTISO3	Carotenoid isomerase [Source:UniProtKB/TrEMBL;Acc:B7G5U6]	Phatr3_J54842.t1	FADNAD(P)-binding oxidoreductase family protein	16	66406	68035	-0.110272	-0.158292	0.210732	0.143286
5	Phatr3_J45243	CRTISO4	Carotenoid isomerase [Source:UniProtKB/TrEMBL;Acc:B7FWY8]	Phatr3_J45243.t1	FADNAD(P)-binding oxidoreductase family protein	6	585988	587784	2.71256	0.990785	3.01e-15	4.98019e-29
6	Phatr3_J9210	CRTISO5	CRTISO5 carotenoid isomerase 5,phytoene dehydrogenase-related protein [Source:UniProtKB/TrEMBL;Acc:B7FQF7]	Phatr3_J9210.t1	FADNAD(P)-binding oxidoreductase family protein	1	1892505	1894579	-1.6836	0.757972	3.26e-52	7.147e-37
7	Phatr3_J9258	DXR	1-deoxy-d-xylulose-5-phosphate reductoisomerase [Source:UniProtKB/TrEMBL;Acc:B7FQZ5]	Phatr3_J9258.t1	1-deoxy-D-xylulose 5-phosphate reductoisomerase (DXR)	1	2304944	2306498	-0.499039	0.952148	2.36e-05	7.15531e-35
8	Phatr3_J46608	DXS	Predicted protein [Source:UniProtKB/TrEMBL;Acc:B7G1U8]	Phatr3_J46608.t1	cullin-associated and neddylation dissociated (CAND1)	10	884475	888806	-0.248211	0.677186	0.00832689	0.0798485
9	Phatr3_J49325	FDPS	Predicted protein [Source:UniProtKB/TrEMBL;Acc:B7GA81]	Phatr3_J49325.t1	farnesyl diphosphate synthase 2 (FPS2)	21	584833	585957	2.30457	0.735323	1.38e-90	1.32037e-15
10	Phatr3_J31683	GGPPS	Predicted protein [Source:UniProtKB/TrEMBL;Acc:B7FP19]	Phatr3_J31683.t1	Pyridine nucleotide-disulphide oxidoreductase family protein	1	695524	697195	2.36057	-0.380474	4.06e-43	0.00346758
11	Phatr3_J19000	GGPS	Farnesyltranstransferase [Source:UniProtKB/TrEMBL;Acc:B7FU89]	Phatr3_J19000.t1	geranylgeranyl pyrophosphate synthase 1 (GGPS1)	4	682203	683332	4.32395	-0.216524	9.02e-26	0.530666
12	Phatr3_J41845	HDR	Hydroxymethylbutenyl diphosphate reductase [Source:UniProtKB/TrEMBL;Acc:B7FUL0]	Phatr3_J41845.t1	4-hydroxy-3-methylbut-2-enyl diphosphate reductase (HDR)	4	980823	982334	0.149622	-0.279997	0.373141	0.723778
13	Phatr3_J44955	HDS	1-hydroxy-2-methyl-2-(E)-butenyl-4-diphosphate synthase [Source:UniProtKB/TrEMBL;Acc:B7FV10]	Phatr3_J44955.t1	4-hydroxy-3-methylbut-2-enyl diphosphate synthase (HDS)	5	765110	767672	-0.102854	-0.387641	0.446975	0.000188246
14	Phatr3_J12533	IDI	Predicted protein [Source:UniProtKB/TrEMBL;Acc:B7FZ04]	Phatr3_J12533.t1	isopentenyl pyrophosphate:dimethylallyl pyrophosphate isomerase 2 (IPP2)	8	549692	550681	0.0261715	0.162402	0.828968	0.0326659
15	Phatr3_J41845	IDS	Hydroxymethylbutenyl diphosphate reductase [Source:UniProtKB/TrEMBL;Acc:B7FUL0]	Phatr3_J41845.t1	4-hydroxy-3-methylbut-2-enyl diphosphate reductase (HDR)	4	980823	982334	0.149622	-0.279997	0.373141	0.723778
16	Phatr3_J8835	LCYB	Precursor of cyclase lycopene beta cyclase [Source:UniProtKB/TrEMBL;Acc:B7FNX5]	Phatr3_J8835.t1	lycopene cyclase (LYC)	1	578114	580229	-0.0344145	-0.506119	0.767916	0.00916055
17	Phatr3_J16586	LUT1	Lutein deficient 1-like protein [Source:UniProtKB/TrEMBL;Acc:B7GCY2]	Phatr3_J16586.t1	cytochrome P450, family 97, subfamily B, polypeptide 3 (CYP97B3)	27	41125	43152	0.821102	-0.316499	4.25e-39	0.00193305
18	Phatr3_J26422	LUT2	Lutein deficient 1-like protein [Source:UniProtKB/TrEMBL;Acc:B7FVK9]	Phatr3_J26422.t1	cytochrome P450, family 97, subfamily B, polypeptide 3 (CYP97B3)	5	196882	199191	-0.845356	0.166937	4.11e-32	0.175797
19	Phatr3_J35509	PDS1	Phytoene dehydrogenase [Source:UniProtKB/TrEMBL;Acc:B7FZL9]	Phatr3_J35509.t1	phytoene desaturase 3 (PDS3)	8	74943	76736	3.29027	1.02832	6.5e-120	0.531172
20	Phatr3_J55102	PDS2	Phytoene desaturase [Source:UniProtKB/TrEMBL;Acc:B7GBV4]	Phatr3_J55102.t1	phytoene desaturase 3 (PDS3)	24	265288	267343	1.57151	-1.09133	5.48e-19	8.43008e-11
21	Phatr3_EG02349	PSY	Phytoene synthase [Source:UniProtKB/TrEMBL;Acc:B7FVW3]	Phatr3_EG02349.t1	PHYTOENE SYNTHASE (PSY)	5	447594	449202	2.5345	-0.965476	1.93e-54	3.04058e-09
22	Phatr3_J51703	VDE	Violaxanthin deepoxidase [Source:UniProtKB/TrEMBL;Acc:B7FUR6]	Phatr3_J51703.t1	non-photochemical quenching 1 (NPQ1)	4	1116291	1117604	3.21268	2.37487	6.38e-79	1.5146e-18
23	Phatr3_J36048	VDL1	Precursor of protein violaxanthin deepoxidase-like protein [Source:UniProtKB/TrEMBL;Acc:B7G087]	Phatr3_J36048.t1	non-photochemical quenching 1 (NPQ1)	9	433920	435485	1.37338	-1.99594	1.95e-22	1.51383e-10
24	Phatr3_J45846	VDL2	Precursor of protein violaxanthin deepoxidase-like protein [Source:UniProtKB/TrEMBL;Acc:B7FYW5]	Phatr3_J45846.t1	violaxanthin de-epoxidase-related	8	452934	454926	1.72563	0.0136876	2.49e-97	0.894266
25	Phatr3_J43240	VDR	Violaxanthin deepoxidase-related, chloroplast [Source:UniProtKB/TrEMBL;Acc:B7FR37]	Phatr3_J43240.t1	violaxanthin de-epoxidase-related	1	2420954	2422717	-1.67418	-0.335119	3.54e-33	1.01141e-05
26	Phatr3_J9040	ZDS	Zeta-carotene desaturase [Source:UniProtKB/TrEMBL;Acc:B7FPC4]	Phatr3_J9040.t1	zeta-carotene desaturase (ZDS)	1	925780	927555	1.22024	0.359548	5.65e-16	0.00101017
27	Phatr3_J45845	ZEP1	Zeaxanthin epoxidase [Source:UniProtKB/TrEMBL;Acc:B7FYW4]	Phatr3_J45845.t1	ABA DEFICIENT 1 (ABA1)	8	450409	452106	-0.648595	-0.612243	0.00100858	6.59261e-06
28	Phatr3_J5928	ZEP2	Precursor of protein zeaxanthin epoxidase-like protein [Source:UniProtKB/TrEMBL;Acc:B7FQV6]	Phatr3_J5928.t1	ABA DEFICIENT 1 (ABA1)	1	2222648	2224716	-0.687123	0.0116582	4.15e-10	0.939766
29	Phatr3_J10970	ZEP3	Zeaxanthin epoxidase [Source:UniProtKB/TrEMBL;Acc:B7FUR7]	Phatr3_J10970.t1	ABA DEFICIENT 1 (ABA1)	4	1118301	1120439	-0.655631	0.141289	2.36e-05	0.0567466
